# Supplementary material for: Highly sensitive optical temperature sensing based on upconversion luminescence in Gd9.33(SiO4)6O2:Yb3+–Er3+/Ho3+ phosphors
Source: Royal Society of Chemistry journal article supplement (doi:10.1039/d0dt01629b), 2020-01-01
Supplement: d0dt01629b1.pdf [file d0dt01629b1.pdf]

High-sensitive optical temperature sensing based on upconversion  
luminescence in  $\text{Gd}_{9.33}(\text{SiO}_4)_6\text{O}_2:\text{Yb}^{3+}\text{-Er}^{3+}/\text{Ho}^{3+}$  phosphors

Jia Zhang<sup>1,2,\*</sup>, Fangsheng Qian<sup>1</sup>

<sup>1</sup>Physics department and Jiangsu Key Laboratory of Modern Measurement  
Technology and Intelligence, Huaiyin Normal University, 111 West Chang Jiang  
Road, Huai'an 223300, China

<sup>2</sup>Jiangsu Key Laboratory for Chemistry of Low-Dimensional Materials, Huaiyin  
Normal University, 111 West Chang Jiang Road, Huai'an 223300, China

\*Corresponding author.

E-mail address: [zhangjianew@126.com](mailto:zhangjianew@126.com)

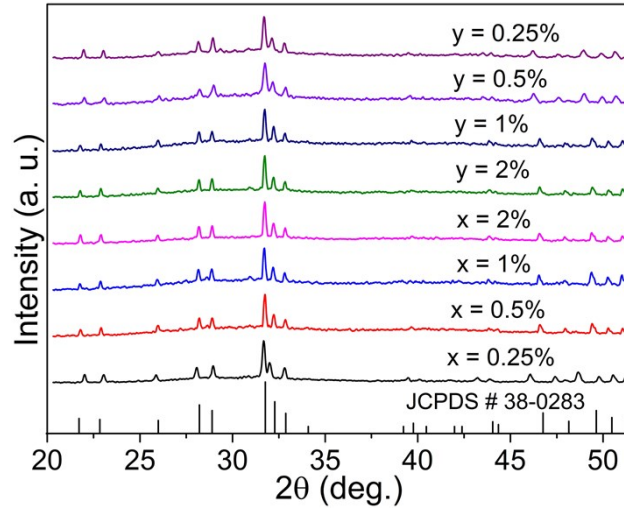

Fig. S1 XRD patterns of GSO:10%Yb<sup>3+</sup>,xEr<sup>3+</sup> (0.25% ≤ x ≤ 2%) and

GSO:10%Yb<sup>3+</sup>,yHo<sup>3+</sup> (0.25% ≤ y ≤ 2%)

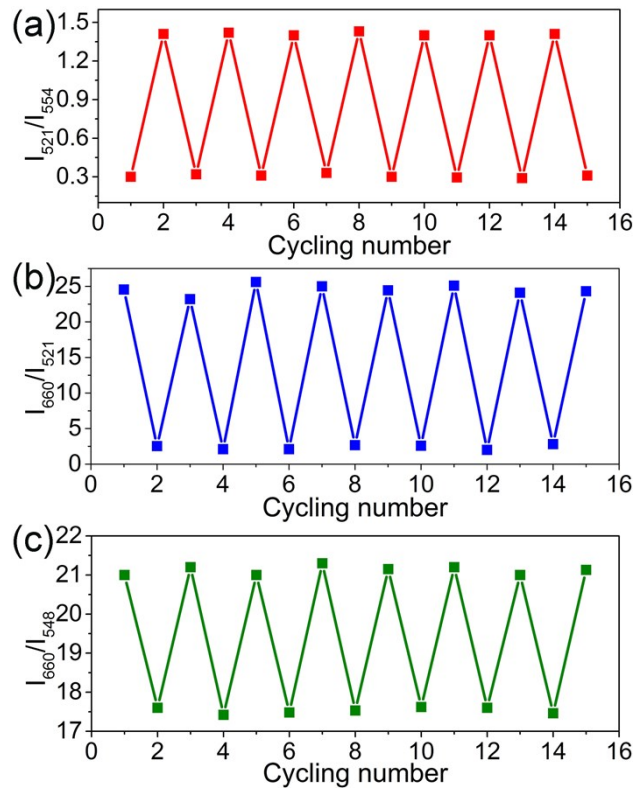

Fig. S2 Temperature-induced switching of (a)  $I_{521}/I_{554}$  and (b)  $I_{660}/I_{521}$  for GSO:10%Yb<sup>3+</sup>,1%Er<sup>3+</sup> as well as (c)  $I_{660}/I_{548}$  for GSO:10%Yb<sup>3+</sup>,0.25%Ho<sup>3+</sup>

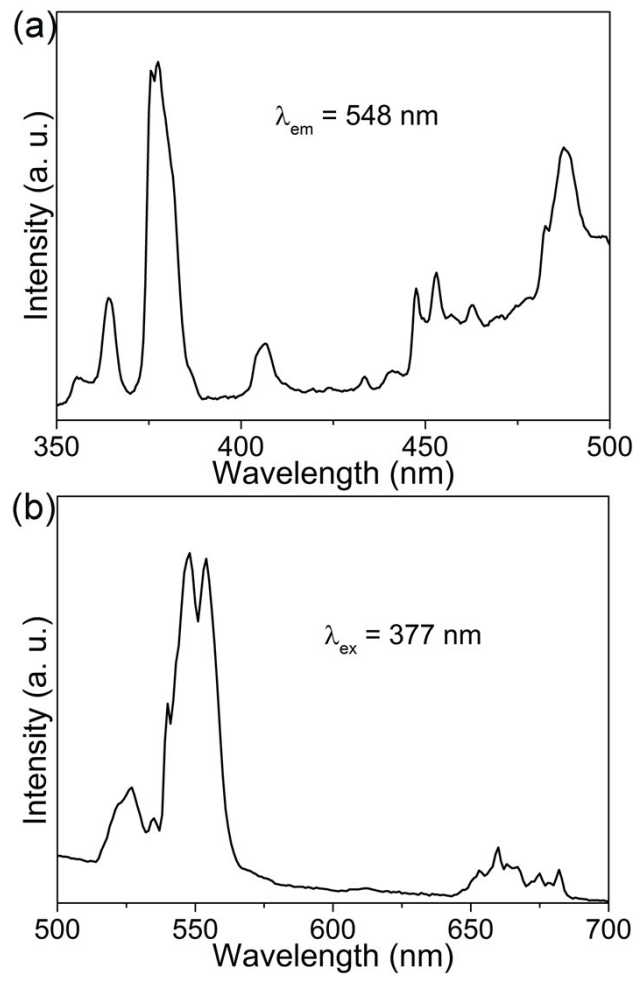

Fig. S3 (a) Excitation and (b) emission spectra of GSO:10%Yb<sup>3+</sup>,1%Er<sup>3+</sup>

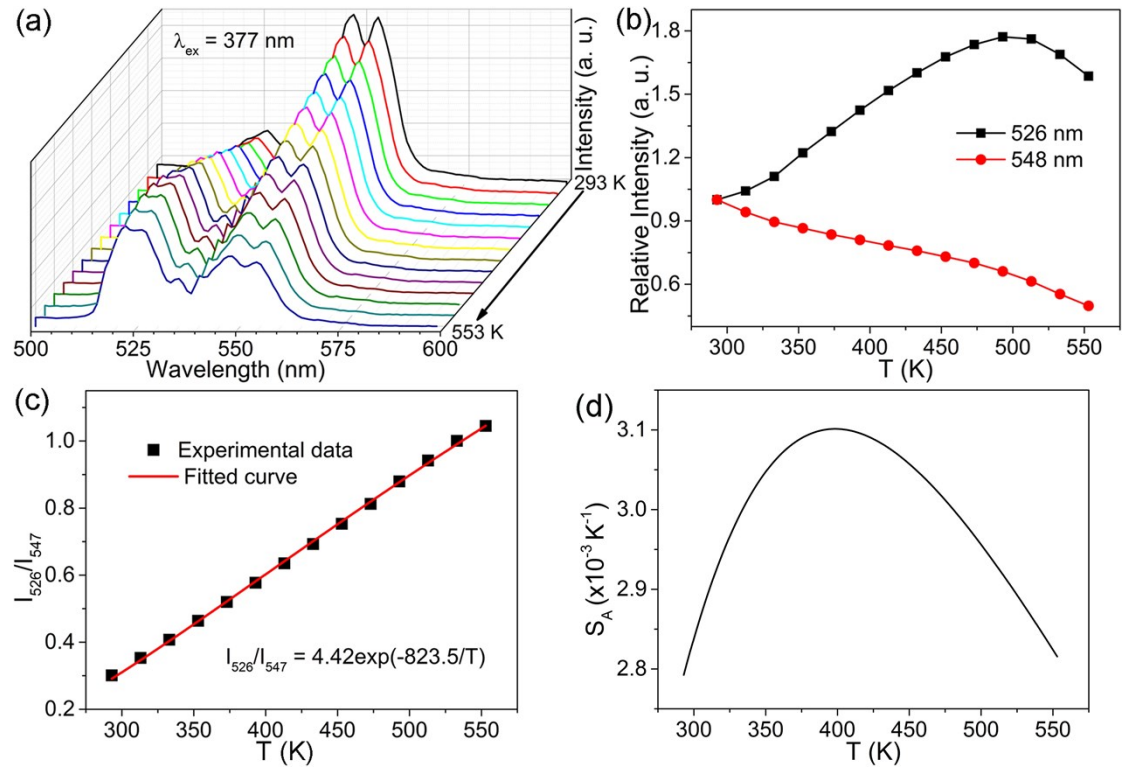

Fig. S4 (a) Emission spectra of GSO:10%Yb<sup>3+</sup>, 1%Er<sup>3+</sup> excited at 377 nm under various temperatures; (b) relative intensities of 526 and 548 nm emissions of Er<sup>3+</sup> as a function of temperature; dependences of  $I_{526}/I_{548}$  on absolute temperature; (d) absolute and relative sensitivities of GSO:10%Yb<sup>3+</sup>, 1%Er<sup>3+</sup> as a function of absolute temperature

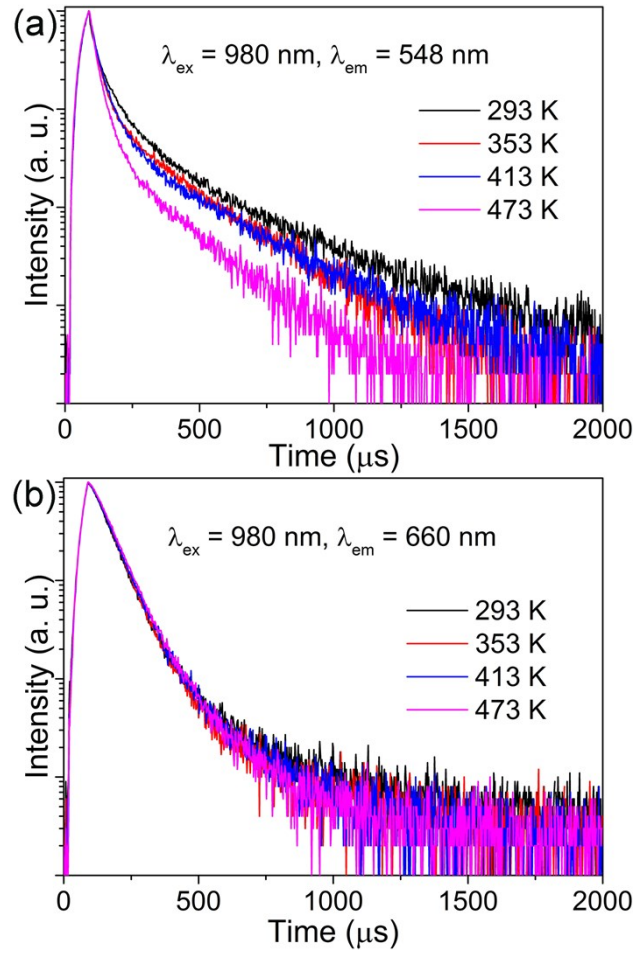

Fig. S5 Decay curves of GSO:10%Yb<sup>3+</sup>,0.25%Ho<sup>3+</sup> under different temperatures by monitoring (a) 548 nm and (b) 660 nm

Table S1  $\tau_i$  and  $A_i$  values for GSO:10%Yb<sup>3+</sup>,0.25%Ho<sup>3+</sup> by monitoring 548 nm under

| different temperatures |               |               |        |       |
|------------------------|---------------|---------------|--------|-------|
| T (K)                  | $\tau_1$ (μs) | $\tau_2$ (μs) | $A_1$  | $A_2$ |
| 298                    | 40.2          | 252.6         | 6317.8 | 983.1 |
| 353                    | 31.3          | 223.8         | 4986.1 | 855.5 |
| 413                    | 34.4          | 247.2         | 7514.7 | 661.7 |
| 473                    | 27.6          | 176.7         | 5709.7 | 492.7 |

Table S2  $\tau_i$  and  $A_i$  values for GSO:10%Yb<sup>3+</sup>,0.25%Ho<sup>3+</sup> by monitoring 660 nm under

different temperatures

| T<br>(K) | $\tau_1$ ( $\mu$ s) | $\tau_2$ ( $\mu$ s) | $A_1$  | $A_2$ |
|----------|---------------------|---------------------|--------|-------|
| 298      | 63.0                | 262.0               | 9411.3 | 199.5 |
| 353      | 64.2                | 248.3               | 9561.5 | 139.6 |
| 413      | 65.5                | 231.1               | 8789.2 | 203.0 |
| 473      | 67.9                | 204.6               | 9080.0 | 216.0 |
